# Supplementary material for: Characterization of Human Subcutaneous Adipose Tissue and Validation of the Banking Procedure for Autologous Transplantation
Source: MDPI journal article supplement (doi:10.3390/ijms24098190), 2023-05-03
Supplement: s1 [file s1]

**Supplementary figures**

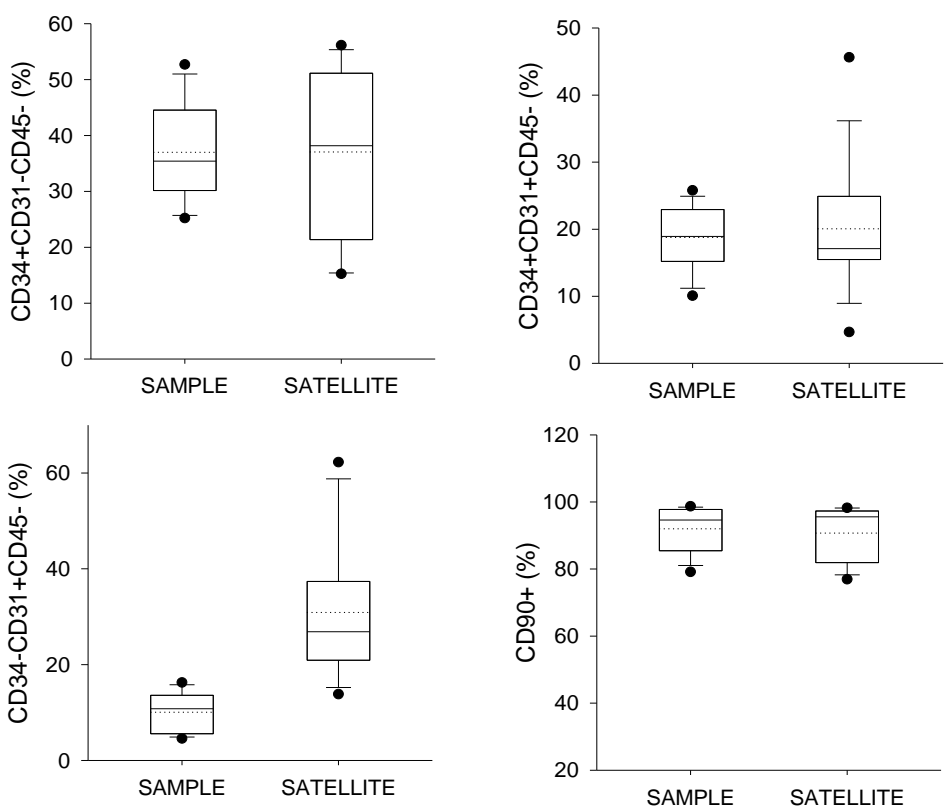

**Figure S1.** Immunophenotyping of the SVF (stromal vascular fraction) performed by flow cytometry in cryopreserved adipose tissue samples and their paired-quality controls (satellite). Plots showed the quantification of adipose stromal/stem cells (ASCs, CD34+CD31-CD45-), endothelial progenitor (CD34+CD31+CD45-) and endothelial mature (CD34-CD31+CD45-) cells contained in SVF. The percentages of each class are displayed as box plot graphs where 5<sup>th</sup> and 95<sup>th</sup> percentiles are highlighted by black circles, the medians by solid lines, and the means by dotted lines. The data were analyzed using one way ANOVA on Ranks.

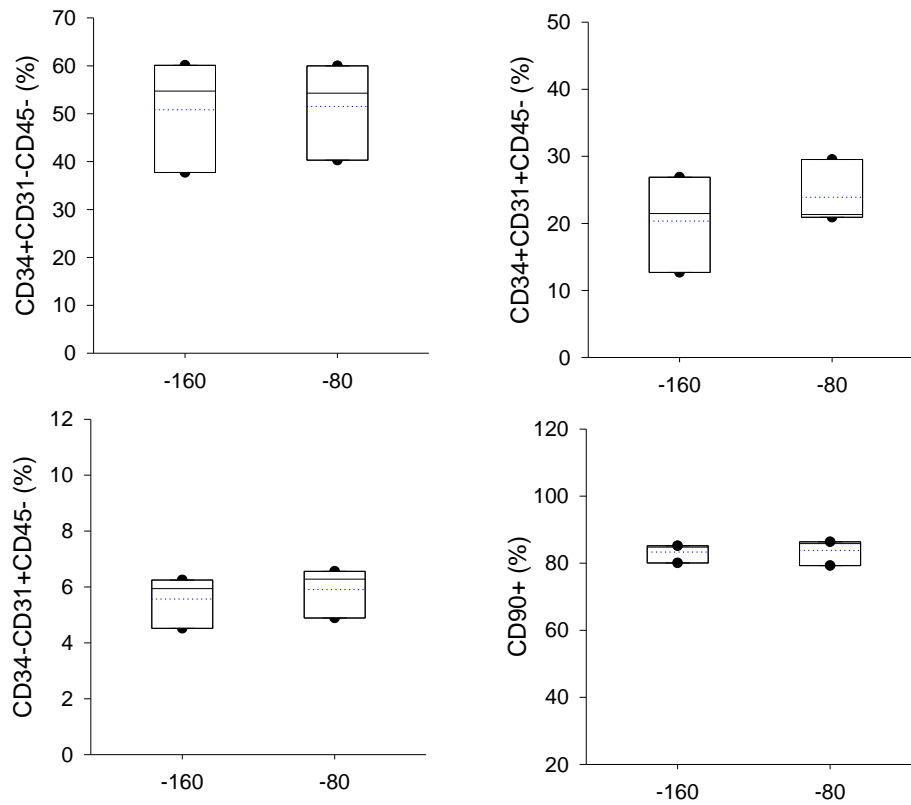

**Figure S2.** Immunophenotyping of the SVF (stromal vascular fraction) in cryopreserved (vapor phase liquid nitrogen, -160) and sample kept in dry ice for 24h (-80) by flow cytometry. Plots showed the quantification of adipose stromal/stem cells (ASCs, CD34+CD31-CD45-), endothelial progenitor (CD34+CD31+CD45-) and endothelial mature (CD34-CD31+CD45-) cells contained in SVF. The percentages of each class are displayed as box plot graphs where 5<sup>th</sup> and 95<sup>th</sup> percentiles are highlighted by black circles, the medians by solid lines, and the means by dotted lines. The data were analyzed using one way ANOVA on Ranks.

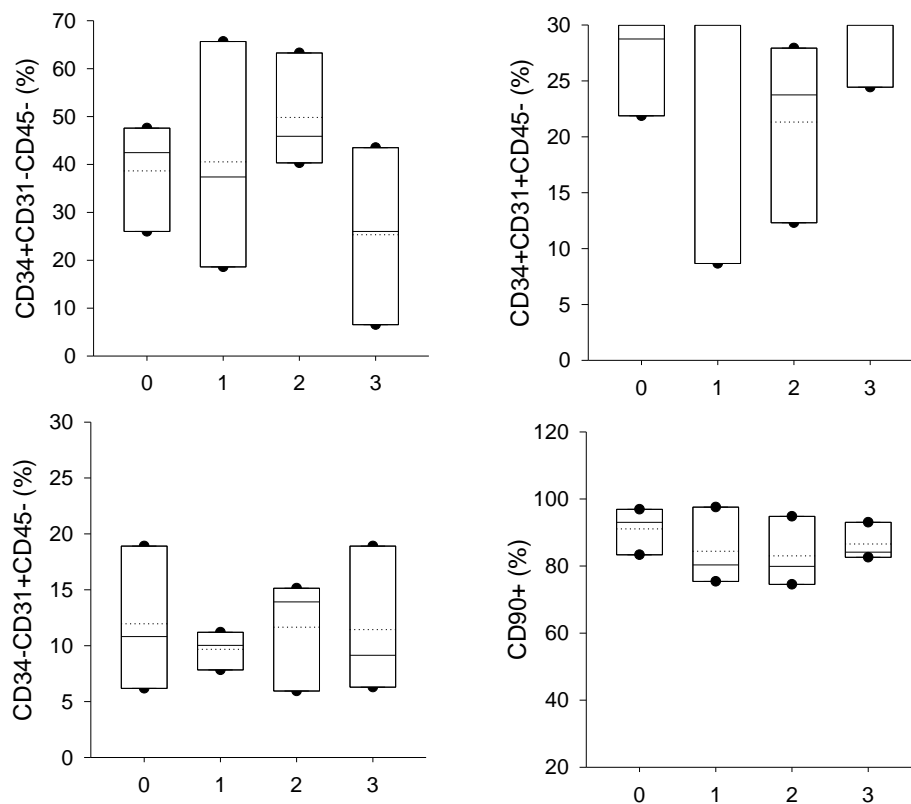

**Figure S3.** Immunophenotyping of the SVF (stromal vascular fraction) in cryopreserved samples (0) and samples kept at  $-80^{\circ}\text{C}$  for a short-term storage (1-3: 1,2 and 3 month of storage) by flow cytometry. Plots showed the quantification of adipose stromal/stem cells (ASCs, CD34+CD31-CD45-), endothelial progenitor (CD34+CD31+CD45-) and endothelial mature (CD34-CD31+CD45-) cells contained in SVF. The percentages of each class are displayed as box plot graphs where 5<sup>th</sup> and 95<sup>th</sup> percentiles are highlighted by black circles, the medians by solid lines, and the means by dotted lines. The data were analyzed using one way ANOVA on Ranks.

0: cryopreserved lipoaspirate, 1: 1-month storage, 2: 2-months storage, t3: 3-months storage. The storage was performed at  $-80^{\circ}\text{C}$ .

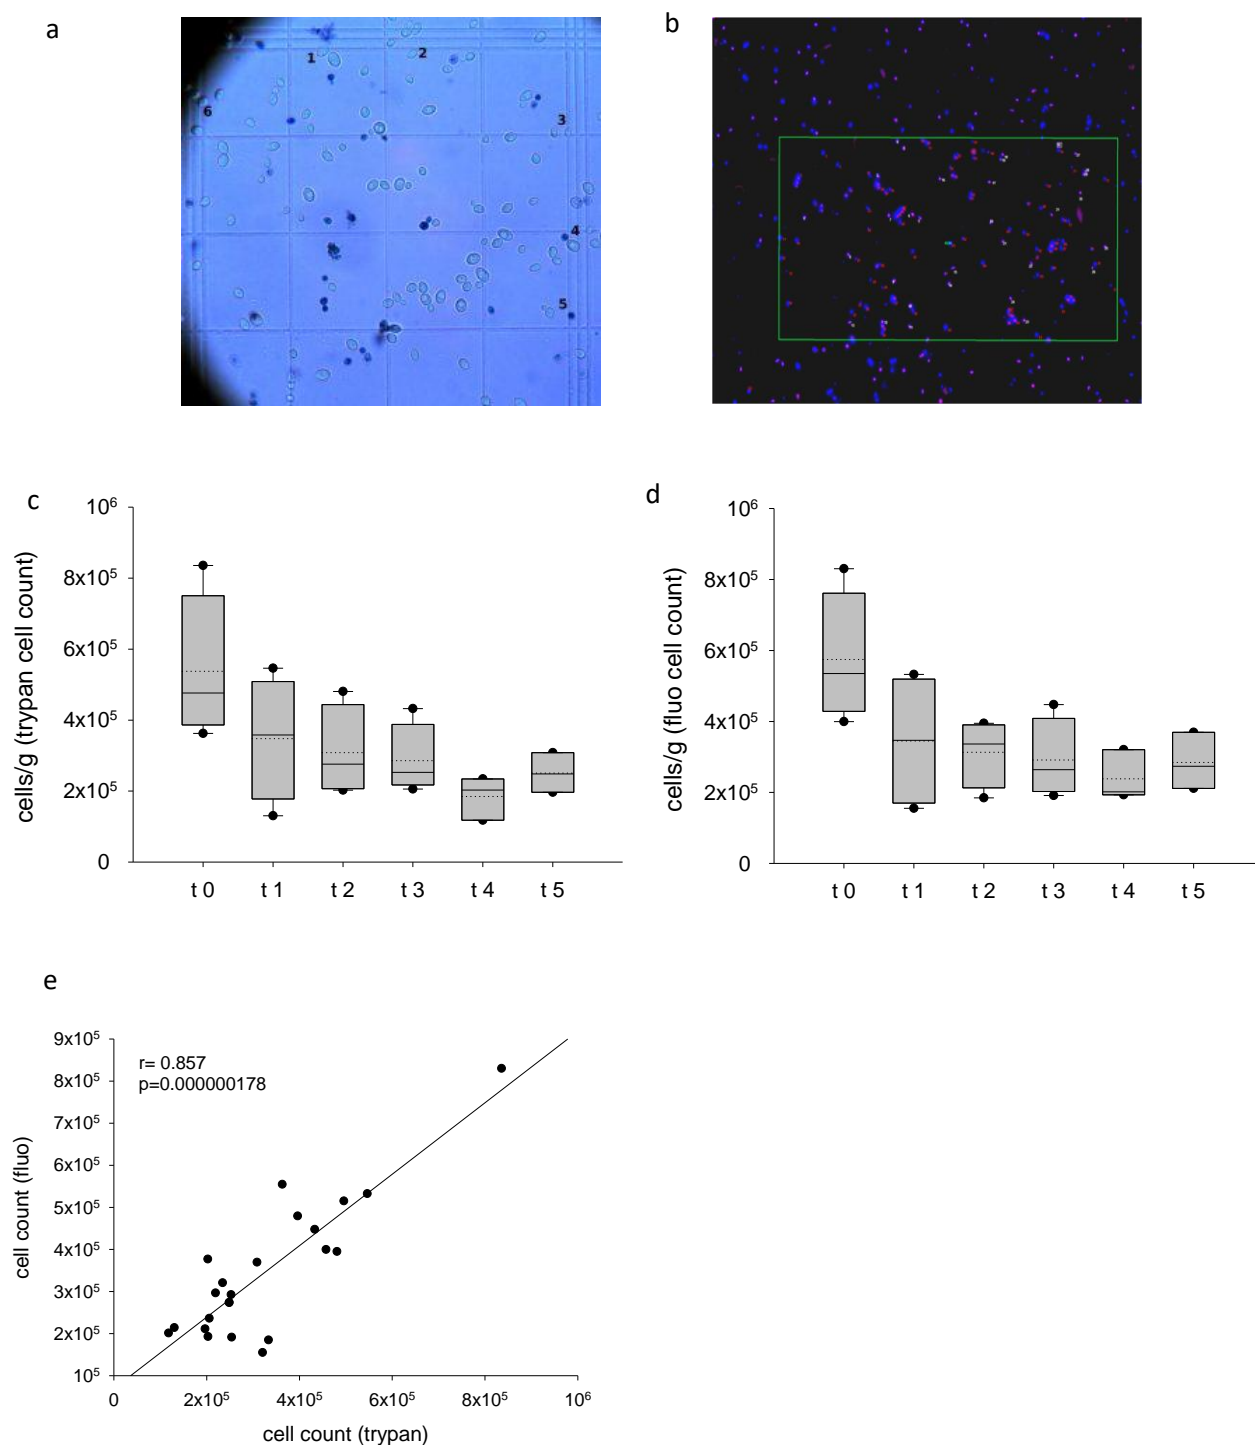

**Figure S4.** Evaluation of the cell count methods in the SVF (stromal vascular fraction) of fresh (t0) and cryopreserved adipose tissue (t1-t5) by microscopy. **a)** Representative picture of a hemocytometer loaded by cell suspension stained by trypan blue solution. **b)** Representative picture of a hemocytometer loaded by cell suspension stained by ReadyProbes Cell Viability solution. **c)** Number of viable cells normalized by sample weight (g), calculated using trypan blue staining for each time point. **d)** Number of viable cells normalized by sample weight (g), calculated using nuclear fluorescent staining (ReadyProbes) for each time point. **e)** Correlation between the number of viable cells/g obtained using trypan blue and fluorescence staining. t0: fresh lipoaspirate, t1: 1 month storage, t2: 2-months storage, t3: 3-months storage, t4: 14-months storage, t5: 36-months storage
